# Supplementary material
Source: ML conference proceedings conference paper supplement (https://proceedings.neurips.cc/paper_files/paper/2016/hash/512c5cad6c37edb98ae91c8a76c3a291-Abstract.html)
Supplement: Supplementary file [file 512c5cad6c37edb98ae91c8a76c3a291-Supplemental.zip]

## 6 Appendix

### 6.1 Derivation of the optimization problem in Eq.(6)

Let  $P(\mathbf{x}_1, \dots, T, v_1, \dots, T | \mathbf{y}_1, \dots, T)$  be the exact posterior. Our goal is to approximate this posterior by a distribution  $Q(\mathbf{x}_1, \dots, T, v_1, \dots, T)$  in the exponential family that minimizes the KL divergence between these two distributions:

$$\begin{aligned}
& KL(Q(\mathbf{x}_1, \dots, T, v_1, \dots, T) | P(\mathbf{x}_1, \dots, T, v_1, \dots, T | \mathbf{y}_1, \dots, T)) \\
&= \sum_{\mathbf{x}_1, \dots, T, v_1, \dots, T} Q(\mathbf{x}_1, \dots, T, v_1, \dots, T) \log \left[ \frac{Q(\mathbf{x}_1, \dots, T, v_1, \dots, T) \cdot P(\mathbf{y}_1, \dots, T)}{P(\mathbf{x}_1, \dots, T, \mathbf{y}_1, \dots, T, v_1, \dots, T)} \right] \\
&= \sum_{\mathbf{x}_1, \dots, T, v_1, \dots, T} Q(\mathbf{x}_1, \dots, T, v_1, \dots, T) \log Q(\mathbf{x}_1, \dots, T, v_1, \dots, T) \\
&\quad - \sum_{t=1}^T \sum_{\mathbf{x}_1, \dots, T, v_1, \dots, T} Q(\mathbf{x}_1, \dots, T, v_1, \dots, T) \log P(\mathbf{x}_t, \mathbf{y}_t, v_t | \mathbf{x}_{t-1}). \tag{12}
\end{aligned}$$

In the first step, we apply the definition of conditional probability and KL-divergence. In the second, we omit  $P(\mathbf{y}_1, \dots, T)$  because it is a constant in this optimization problem. In addition, we decompose  $P(\mathbf{x}_1, \dots, T, \mathbf{y}_1, \dots, T, v_1, \dots, T) = \prod_{t=1}^T P(\mathbf{x}_t, \mathbf{y}_t, v_t | \mathbf{x}_{t-1})$ .

We then define the approximate two-slice statistics  $\hat{\xi}_t(\mathbf{x}_{t-1}, \mathbf{x}_t, v_t)$  and one-slice statistics  $\hat{\gamma}_t(\mathbf{x}_t)$ . Both are in the exponential family. In this context, we have  $M$  individuals in the system and the mean-field approximation can be shown as  $\hat{\gamma}_t(\mathbf{x}_t) = \prod_{m=1}^M \hat{\gamma}_t^{(m)}(x_t^{(m)})$ , where  $\hat{\gamma}_t^{(m)}(x_t^{(m)})$  is the approximate one-slice statistics for individual  $m$ . Given the observation that  $Q(\mathbf{x}_1, \dots, T, v_1, \dots, T)$  can be expressed as a product of two-slice statistics divided by a product of one-slice statistics, then

$$Q(\mathbf{x}_1, \dots, T, v_1, \dots, T) = \frac{\prod_{t=1}^T \hat{\xi}_t(\mathbf{x}_{t-1}, \mathbf{x}_t, v_t)}{\prod_{t=1}^{T-1} \hat{\gamma}_t(\mathbf{x}_t)} = \frac{\prod_{t=1}^T \hat{\xi}_t(\mathbf{x}_{t-1}, \mathbf{x}_t, v_t)}{\prod_{t=1}^{T-1} \prod_{m=1}^M \hat{\gamma}_t^{(m)}(x_t^{(m)})}. \tag{13}$$

If we substitute Eq. (13) into Eq. (12), the objective function becomes the following:

$$\begin{aligned}
& \sum_{\mathbf{x}_1, \dots, T, v_1, \dots, T} Q(\mathbf{x}_1, \dots, T, v_1, \dots, T) \log \frac{\prod_{t=1}^T \hat{\xi}_t(\mathbf{x}_{t-1}, \mathbf{x}_t, v_t)}{\prod_{t=1}^{T-1} \prod_{m=1}^M \hat{\gamma}_t^{(m)}(x_t^{(m)})} \\
& - \sum_{t=1}^T \sum_{\mathbf{x}_1, \dots, T, v_1, \dots, T} Q(\mathbf{x}_1, \dots, T, v_1, \dots, T) \log P(\mathbf{x}_t, \mathbf{y}_t, v_t | \mathbf{x}_{t-1}) \\
&= \sum_{t, \mathbf{x}_{t-1}, \mathbf{x}_t, v_t} \hat{\xi}_t(\mathbf{x}_{t-1}, \mathbf{x}_t, v_t) \log \frac{\hat{\xi}_t(\mathbf{x}_{t-1}, \mathbf{x}_t, v_t)}{P(\mathbf{x}_t, \mathbf{y}_t, v_t | \mathbf{x}_{t-1})} \\
& - \sum_{t, \mathbf{x}_t} \prod_m \hat{\gamma}_t^{(m)}(x_t^{(m)}) \log \prod_m \hat{\gamma}_t^{(m)}(x_t^{(m)}). \tag{14}
\end{aligned}$$

This objective function is subject to marginalization and normalization constraints:

$$\begin{aligned}
& \sum_{v_t, \mathbf{x}_{t-1}, \{\mathbf{x}_t \setminus x_t^{(m)}\}} \hat{\xi}_t(\mathbf{x}_{t-1}, \mathbf{x}_t, v_t) = \hat{\gamma}_t^{(m)}(x_t^{(m)}), \text{ for all } t, m, x_t^{(m)}, \\
& \sum_{v_t, \{\mathbf{x}_{t-1} \setminus x_{t-1}^{(m)}\}, \mathbf{x}_t} \hat{\xi}_t(\mathbf{x}_{t-1}, \mathbf{x}_t, v_t) = \hat{\gamma}_{t-1}^{(m)}(x_{t-1}^{(m)}), \text{ for all } t, m, x_{t-1}^{(m)}, \\
& \sum_{x_t^{(m)}} \hat{\gamma}_t^{(m)}(x_t^{(m)}) = 1, \text{ for all } t, m.
\end{aligned}$$

$\sum_{\{\mathbf{x}_t \setminus x_t^{(m)}\}}$  refers to the sum over all values of  $\mathbf{x}_t$  except  $x_t^{(m)}$ .

## 6.2 Derivation of the inference algorithm from Eq.(8) to Eq.(10)

The optimization problem derived from Eq. (14) along with the constraints can be shown as follows:

$$\sum_{t, \mathbf{x}_{t-1}, \mathbf{x}_t, v_t} \hat{\xi}_t(\mathbf{x}_{t-1}, \mathbf{x}_t, v_t) \log \frac{\hat{\xi}_t(\mathbf{x}_{t-1}, \mathbf{x}_t, v_t)}{P(\mathbf{x}_t, \mathbf{y}_t, v_t | \mathbf{x}_{t-1})} - \sum_{t, \mathbf{x}_t} \prod_m \hat{\gamma}_t^{(m)}(x_t^{(m)}) \log \prod_m \hat{\gamma}_t^{(m)}(x_t^{(m)}) \quad (15)$$

subject to:

$$\begin{aligned} \sum_{v_t, \mathbf{x}_{t-1}, \{\mathbf{x}_t \setminus x_t^{(m)}\}} \hat{\xi}_t(\mathbf{x}_{t-1}, \mathbf{x}_t, v_t) &= \hat{\gamma}_t^{(m)}(x_t^{(m)}), \text{ for all } t, m, x_t^{(m)}, \\ \sum_{v_t, \{\mathbf{x}_{t-1} \setminus x_{t-1}^{(m)}\}, \mathbf{x}_t} \hat{\xi}_t(\mathbf{x}_{t-1}, \mathbf{x}_t, v_t) &= \hat{\gamma}_{t-1}^{(m)}(x_{t-1}^{(m)}), \text{ for all } t, m, x_{t-1}^{(m)}, \\ \sum_{x_t^{(m)}} \hat{\gamma}_t^{(m)}(x_t^{(m)}) &= 1, \text{ for all } t, m. \end{aligned}$$

We apply the method of Lagrange multipliers to solve this, which begins with forming the Lagrange function to be optimized:

$$\begin{aligned} L = & \sum_{t, \mathbf{x}_{t-1}, \mathbf{x}_t, v_t} \hat{\xi}_t(\mathbf{x}_{t-1}, \mathbf{x}_t, v_t) \log \frac{\hat{\xi}_t(\mathbf{x}_{t-1}, \mathbf{x}_t, v_t)}{P(\mathbf{x}_t, \mathbf{y}_t, v_t | \mathbf{x}_{t-1})} - \sum_{t, \mathbf{x}_t} \prod_m \hat{\gamma}_t^{(m)}(x_t^{(m)}) \log \prod_m \hat{\gamma}_t^{(m)}(x_t^{(m)}) \quad (16) \\ & + \sum_{t, m, x_t^{(m)}} \lambda_t^{(m)}(x_t^{(m)}) \left( \sum_{v_t, \mathbf{x}_{t-1}, \{\mathbf{x}_t \setminus x_t^{(m)}\}} \hat{\gamma}_t^{(m)}(x_t^{(m)}) - \hat{\xi}_t(\mathbf{x}_{t-1}, \mathbf{x}_t, v_t) \right) \\ & + \sum_{t, m, x_{t-1}^{(m)}} \mu_{t-1}^{(m)}(x_{t-1}^{(m)}) \left( \sum_{v_t, \{\mathbf{x}_{t-1} \setminus x_{t-1}^{(m)}\}, \mathbf{x}_t} \hat{\gamma}_{t-1}^{(m)}(x_{t-1}^{(m)}) - \hat{\xi}_t(\mathbf{x}_{t-1}, \mathbf{x}_t, v_t) \right) \\ & + \sum_{t, m, x_t^{(m)}} \nu(x_t^{(m)}) \left( \sum_{x_t^{(m)}} \hat{\gamma}_t^{(m)}(x_t^{(m)}) - 1 \right) \end{aligned}$$

We then set the partial derivatives of Eq. (16) over  $\hat{\xi}_t(\mathbf{x}_{t-1}, \mathbf{x}_t, v_t)$  to 0, which results in the following:

$$\begin{aligned} \frac{\partial L}{\partial \hat{\xi}_t(\mathbf{x}_{t-1}, \mathbf{x}_t, v_t)} &= \log \frac{\hat{\xi}_t(\mathbf{x}_{t-1}, \mathbf{x}_t, v_t)}{P(\mathbf{x}_t, \mathbf{y}_t, v_t | \mathbf{x}_{t-1})} + 1 - \sum_m \lambda_t^{(m)}(x_t^{(m)}) - \sum_m \mu_{t-1}^{(m)}(x_{t-1}^{(m)}) \stackrel{\text{set}}{=} 0 \\ \Rightarrow \hat{\xi}_t(\mathbf{x}_{t-1}, \mathbf{x}_t, v_t) &\propto \exp \left( \sum_m \mu_{t-1}^{(m)}(x_{t-1}^{(m)}) \right) P(\mathbf{x}_t, \mathbf{y}_t, v_t | \mathbf{x}_{t-1}) \exp \left( \sum_m \lambda_t^{(m)}(x_t^{(m)}) \right), \end{aligned}$$

As such, we see that  $\hat{\alpha}_{t-1}^{(m)}(x_{t-1}^{(m)}) = \exp(\mu_{t-1}^{(m)}(x_{t-1}^{(m)}))$  is associated with the forward probabilities and  $\hat{\beta}_t^{(m)}(x_t^{(m)}) = \exp(\lambda_t^{(m)}(x_t^{(m)}))$  with the backward probabilities, with  $\hat{\gamma}_t^{(m)}(x_t^{(m)}) = \hat{\alpha}_t^{(m)}(x_t^{(m)}) \hat{\beta}_t^{(m)}(x_t^{(m)})$ . We can determine the two-slice statistics for an individual  $m$  by marginalizing the other individuals  $m' \neq m$ :

$$\begin{aligned} \hat{\xi}_t(x_{t-1}^{(m)}, x_t^{(m)}, v_t) &= \sum_{m' \neq m, x_{t-1}^{(m')}, x_t^{(m')}} \hat{\xi}_t(\mathbf{x}_{t-1}, \mathbf{x}_t, v_t) \\ &\propto \sum_{m' \neq m, x_{t-1}^{(m')}, x_t^{(m')}} P(\mathbf{x}_t, v_t | \mathbf{x}_{t-1}) \cdot \prod_m \hat{\alpha}_{t-1}^{(m)}(x_{t-1}^{(m)}) \cdot \prod_m P(y_t^{(m)} | x_t^{(m)}) \cdot \prod_m \hat{\beta}_t^{(m)}(x_t^{(m)}). \end{aligned}$$

The above is the same as in Eq. (7).

### 6.3 Derivation of the parameter-learning algorithm

From Eq.(3), the log-likelihood of the entire sequence can be shown as this:

$$\log P(\mathbf{x}_{1,\dots,T}, \mathbf{y}_{1,\dots,T}, v_{1,\dots,T}) = \sum_{t=1}^T \log P(\mathbf{x}_t, v_t | \mathbf{x}_{t-1}) + \sum_{t=1}^T \log P(\mathbf{y}_t | \mathbf{x}_t), \text{ where} \quad (17)$$

$$P(\mathbf{x}_t, v_t | \mathbf{x}_{t-1}) = \begin{cases} c_k \cdot g_k(\mathbf{x}_{t-1}) \cdot \delta(\mathbf{x}_t - \mathbf{x}_{t-1} \equiv \mathbf{\Delta}_k) & \text{if } v_t = k \\ (1 - \sum_k c_k g_k(\mathbf{x}_{t-1})) \cdot \delta(\mathbf{x}_t - \mathbf{x}_{t-1} \equiv \mathbf{0}) & \text{if } v_t = \emptyset \end{cases}.$$

The probabilities for state transition can be shown as the probabilities of a set of events. The expected log likelihood over the posterior probability conditioned on the observations  $\mathbf{y}_1, \dots, \mathbf{y}_T$  takes the following form:

$$\begin{aligned} & \mathbb{E}_{P(\mathbf{x}_{1,\dots,T}, v_{1,\dots,T} | \mathbf{y}_{1,\dots,T})} (\log P(\mathbf{x}_{1,\dots,T}, \mathbf{y}_{1,\dots,T}, v_{1,\dots,T})) \\ &= \sum_{t, \mathbf{x}_{t-1}, \mathbf{x}_t, v_t} \hat{\xi}_t(\mathbf{x}_{t-1}, \mathbf{x}_t, v_t) \cdot \log(P(\mathbf{x}_t, v_t | \mathbf{x}_{t-1}) P(\mathbf{y}_t | \mathbf{x}_t)) \\ &= \sum_{t, \mathbf{x}_{t-1}, \mathbf{x}_t} \hat{\xi}_t(\mathbf{x}_{t-1}, \mathbf{x}_t, v_t = v) \cdot \log(P(\mathbf{x}_t, v_t = v | \mathbf{x}_{t-1}) P(\mathbf{y}_t | \mathbf{x}_t)) \\ &+ \sum_{t, \mathbf{x}_{t-1}, \mathbf{x}_t} \hat{\xi}_t(\mathbf{x}_{t-1}, \mathbf{x}_t, v_t = \emptyset) \cdot \log(P(\mathbf{x}_t, v_t = \emptyset | \mathbf{x}_{t-1}) P(\mathbf{y}_t | \mathbf{x}_t)) \end{aligned} \quad (18)$$

At a given time  $t$ , there are two possible cases:  $v_t = v$ , where  $v \in \{1, \dots, V\}$ , and  $v_t = \emptyset$ . The derivatives with respect to  $c_k$  can be shown as follows:

$$\begin{aligned} \frac{\partial \log P(\mathbf{x}_t, v_t = k | \mathbf{x}_{t-1})}{\partial c_k} &= \frac{1}{c_k} \\ \frac{\partial \log P(\mathbf{x}_t, v_t = \emptyset | \mathbf{x}_{t-1})}{\partial c_k} &= \frac{-g_k(\mathbf{x}_{t-1})}{1 - \sum_k c_k g_k(\mathbf{x}_{t-1})} \end{aligned}$$

Note that here we do not detail  $\delta(\mathbf{x}_t - \mathbf{x}_{t-1} \equiv \mathbf{\Delta}_k)$  and  $\delta(\mathbf{x}_t - \mathbf{x}_{t-1} \equiv \mathbf{0})$  explicitly, because when calculating the derivatives of expected log likelihood in Eq.(18) these terms will be contained in  $\hat{\xi}_t(\mathbf{x}_{t-1}, \mathbf{x}_t, v_t = k)$  and  $\hat{\xi}_t(\mathbf{x}_{t-1}, \mathbf{x}_t, v_t = \emptyset)$ . Next we take the derivative of expected log likelihood with respect to  $c_k$ :

$$\begin{aligned} & \frac{\mathbb{E}_{P(\mathbf{x}_{1,\dots,T}, v_{1,\dots,T} | \mathbf{y}_{1,\dots,T})} (\log P(\mathbf{x}_{1,\dots,T}, \mathbf{y}_{1,\dots,T}, v_{1,\dots,T}))}{\partial c_k} \\ &= \sum_{t, \mathbf{x}_{t-1}, \mathbf{x}_t} \hat{\xi}_t(\mathbf{x}_{t-1}, \mathbf{x}_t, v_t = k) \frac{1}{c_k} - \sum_{t, \mathbf{x}_{t-1}, \mathbf{x}_t} \hat{\xi}_t(\mathbf{x}_{t-1}, \mathbf{x}_t, v_t = \emptyset) \frac{g_k(\mathbf{x}_{t-1})}{1 - \sum_k c_k g_k(\mathbf{x}_{t-1})} \end{aligned} \quad (19)$$

Because we assume that the auxiliary event dominates when the time step is small, we approximate  $1 - \sum_k c_k g_k(\mathbf{x}_t) \approx 1$  and  $\sum_{\mathbf{x}_t} \hat{\xi}_t(\mathbf{x}_{t-1}, \mathbf{x}_t, v_t = \emptyset) \approx \hat{\gamma}_{t-1}(\mathbf{x}_{t-1})$ . After applying this approximation and setting the derivative to 0, the result is as follows:

$$\begin{aligned} c_k &= \frac{\sum_t \sum_{\mathbf{x}_{t-1}, \mathbf{x}_t} \hat{\xi}_t(\mathbf{x}_{t-1}, \mathbf{x}_t, v_t = k)}{\sum_t \sum_{\mathbf{x}_{t-1}, \mathbf{x}_t} \hat{\xi}_t(\mathbf{x}_{t-1}, \mathbf{x}_t, v_t = \emptyset) g_k(\mathbf{x}_{t-1})} \\ &\approx \frac{\sum_t \sum_{\mathbf{x}_{t-1}, \mathbf{x}_t} \hat{\xi}_t(\mathbf{x}_{t-1}, \mathbf{x}_t, v_t = k)}{\sum_t \sum_{\mathbf{x}_{t-1}} \hat{\gamma}_{t-1}(\mathbf{x}_{t-1}) g_k(\mathbf{x}_{t-1})} \\ &= \frac{\sum_t \sum_{\mathbf{x}_{t-1}, \mathbf{x}_t} \hat{\xi}_t(\mathbf{x}_{t-1}, \mathbf{x}_t, v_t = k)}{\sum_t \prod_m \sum_{x_{t-1}^{(m)}} \hat{\gamma}_{t-1}^{(m)}(x_{t-1}^{(m)}) g_k^{(m)}(x_{t-1}^{(m)})}. \end{aligned} \quad (20)$$
